# Supplementary material for: Amended Vegetation Filters as Nature-Based Solutions for the Treatment of Pharmaceuticals: Infiltration Experiments Coupled to Reactive Transport Modelling
Source: MDPI journal article supplement (doi:10.3390/toxics12050334), 2024-05-04
Supplement: s1 [file s1]

## Amended Vegetation Filters as nature-based solutions for the treatment of pharmaceuticals: infiltration experiments coupled to reactive transport modelling – Supplementary Materials

### A) Column WS average flow rate simulated with the single-porosity model

Figure S1 presents experimental and simulated average flow rates when a single-porosity approach is applied in Column WS.

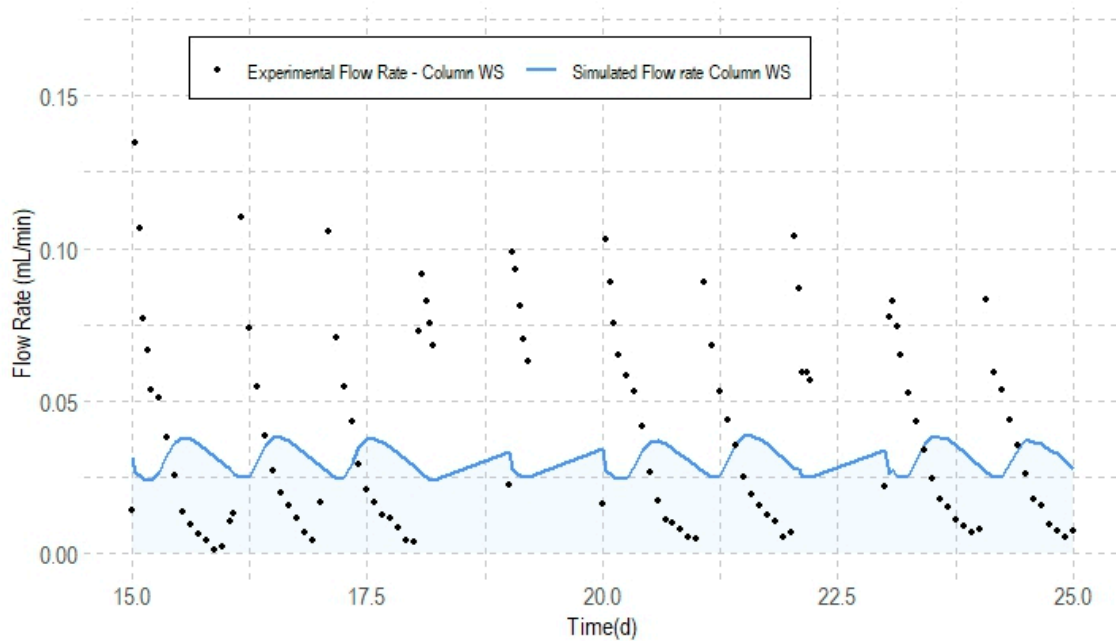

**Figure S1.** Experimental and corresponding simulated average outflow flow rates from Column WS applying a single-porosity model (RMSE: 0.030 mL/min).

### B) Sensitivity Analysis: Effect on simulated ketoprofen breakthrough curves

Figure S2 presents the Column WS ketoprofen breakthrough curves resulting from the base model run and from the sensitivity analysis when  $\theta_{smo}$ ,  $\alpha$  and  $n$  are varied  $\pm 25\%$ .

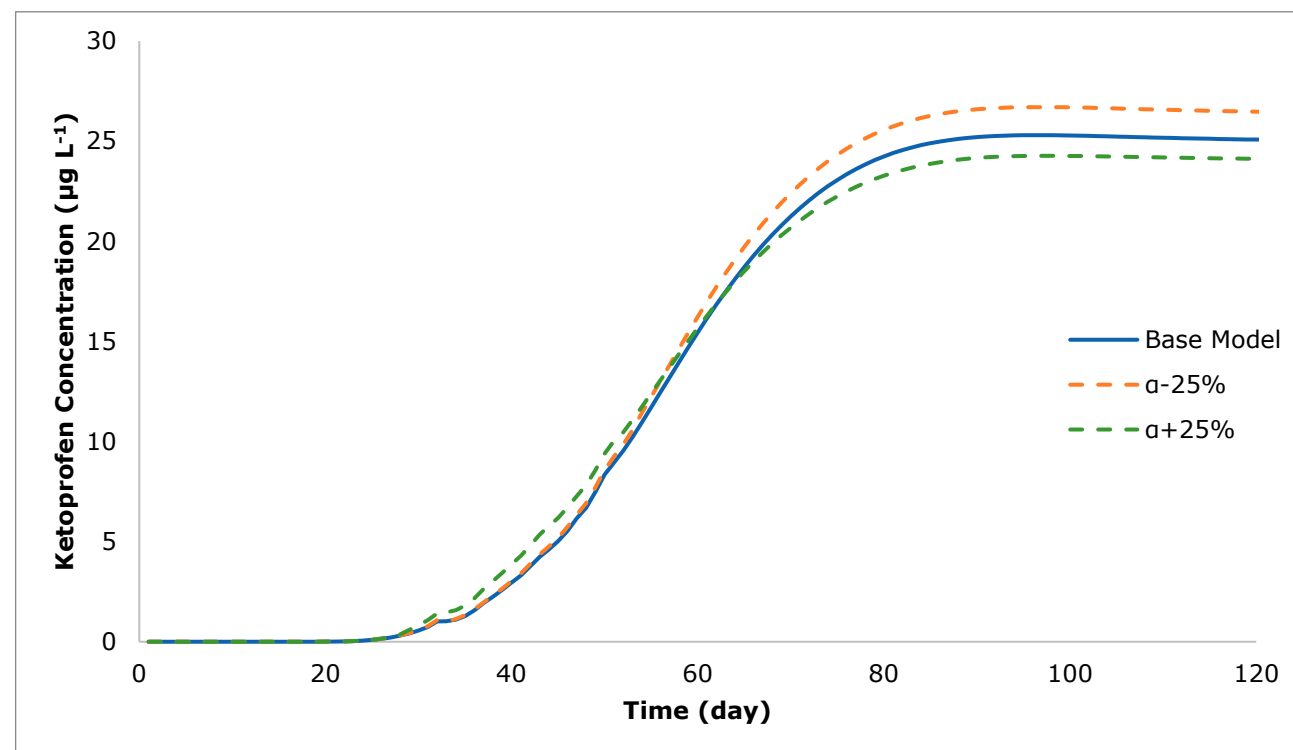

(a)

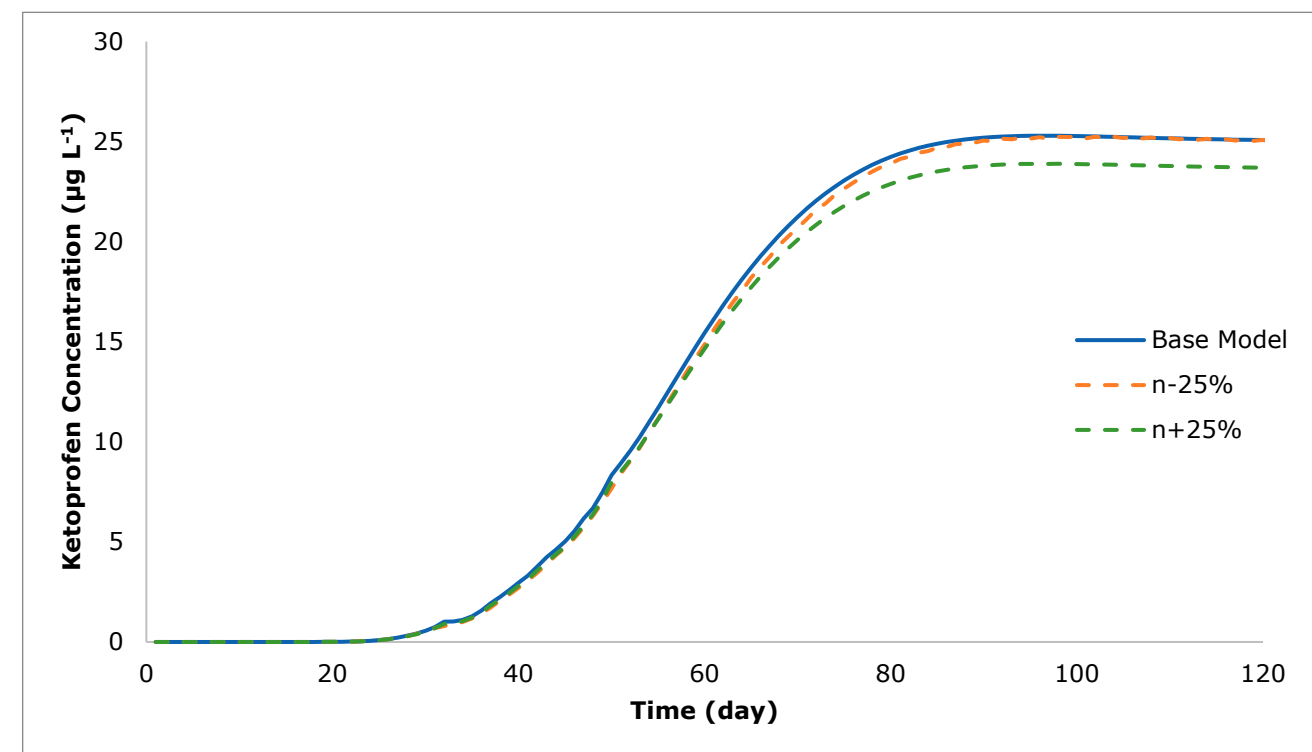

(b)

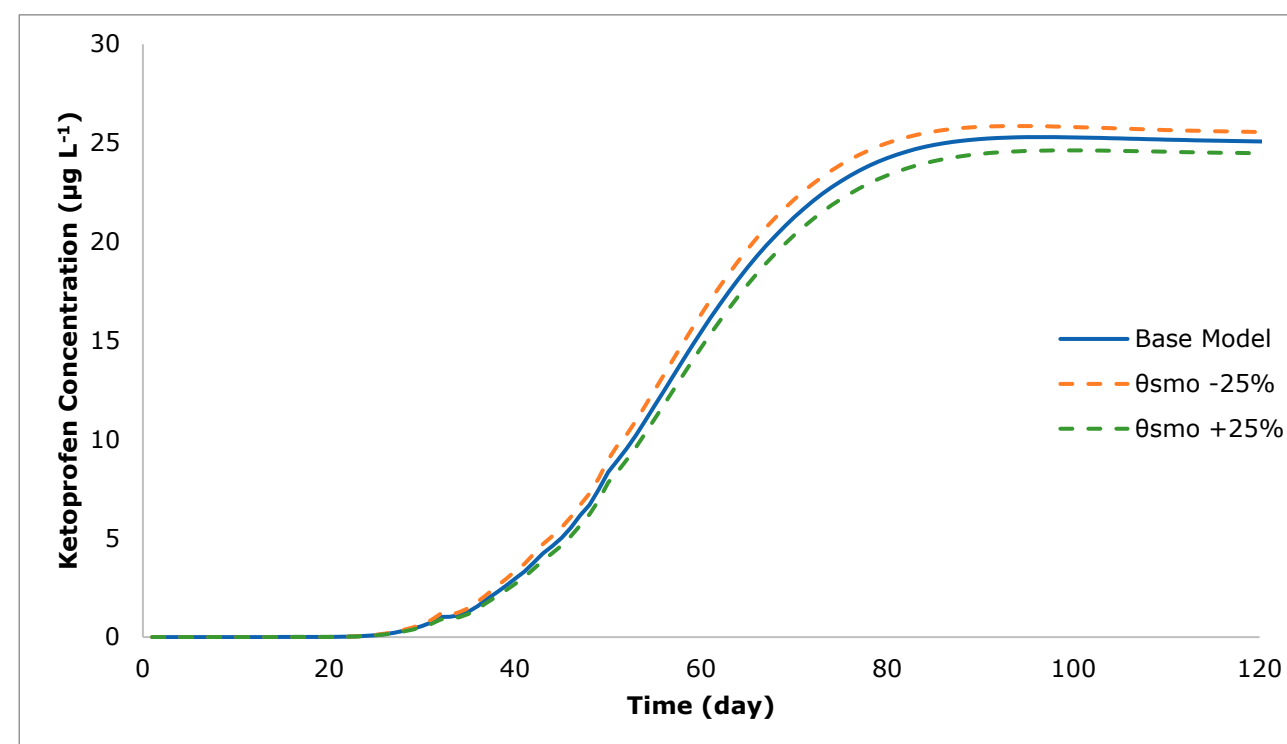

(c)

**Figure S2.** Column WS simulated ketoprofen breakthrough curves resulting from the base model run and from the sensitivity analysis when (a)  $\alpha$ , (b)  $n$  and (c)  $\theta_{smo}$  are varied  $\pm 25\%$ .
